# Supplementary material
Source: ML conference proceedings conference paper supplement (https://proceedings.neurips.cc/paper_files/paper/2012/hash/c52f1bd66cc19d05628bd8bf27af3ad6-Abstract.html)
Supplement: Supplementary file 1 [file c52f1bd66cc19d05628bd8bf27af3ad6-Supplemental.zip]

---

# Supplementary Material: Stochastic Gradient Descent with Only One Projection

---

**Mehrdad Mahdavi<sup>†</sup>, Tianbao Yang<sup>‡</sup>, Rong Jin<sup>†</sup>, Shenghuo Zhu<sup>\*</sup>, and Jinfeng Yi<sup>†</sup>**

<sup>†</sup>Dept. of Computer Science and Engineering, Michigan State University, MI, USA

<sup>‡</sup>Machine Learning Lab, GE Global Research, CA, USA

<sup>\*</sup>NEC Laboratories America, CA, USA

<sup>†</sup>{mahdavi, rongjin, yijinfen}@msu.edu, <sup>‡</sup>tyang@ge.com, <sup>\*</sup>zsh@nec-labs.com

## A Proof of Lemma 1

Following the standard analysis of gradient descent methods, we have for any  $\mathbf{x} \in \mathcal{B}$ ,

$$\begin{aligned}
 \|\mathbf{x}_{t+1} - \mathbf{x}\|_2^2 - \|\mathbf{x}_t - \mathbf{x}\|_2^2 &\leq \|\mathbf{x}'_{t+1} - \mathbf{x}\|_2^2 - \|\mathbf{x}_t - \mathbf{x}\|_2^2 \\
 &= \|\mathbf{x}_t - \eta_t(\tilde{\nabla}f(\mathbf{x}_t, \xi_t) + \lambda_t \nabla g(\mathbf{x}_t)) - \mathbf{x}\|_2^2 - \|\mathbf{x}_t - \mathbf{x}\|_2^2 \\
 &\leq \eta_t^2 \|\tilde{\nabla}f(\mathbf{x}_t, \xi_t) + \lambda_t \nabla g(\mathbf{x}_t)\|_2^2 - 2\eta_t(\mathbf{x}_t - \mathbf{x})^\top (\tilde{\nabla}f(\mathbf{x}_t, \xi_t) + \lambda_t \nabla g(\mathbf{x}_t)) \\
 &\leq \eta_t^2 \|\tilde{\nabla}f(\mathbf{x}_t, \xi_t) + \lambda_t \nabla g(\mathbf{x}_t)\|_2^2 \\
 &\quad - 2\eta_t(\mathbf{x}_t - \mathbf{x})^\top \underbrace{(\nabla f(\mathbf{x}_t) + \lambda_t \nabla g(\mathbf{x}_t))}_{\equiv \nabla_{\mathbf{x}} L(\mathbf{x}_t, \lambda_t)} + 2\eta_t \underbrace{(\mathbf{x} - \mathbf{x}_t)^\top (\tilde{\nabla}f(\mathbf{x}_t, \xi_t) - \nabla f(\mathbf{x}_t))}_{\equiv \zeta_t(\mathbf{x})},
 \end{aligned}$$

Then we have

$$\begin{aligned}
 (\mathbf{x}_t - \mathbf{x})^\top \nabla_{\mathbf{x}} L(\mathbf{x}_t, \lambda_t) &\leq \frac{1}{2\eta_t} (\|\mathbf{x}_t - \mathbf{x}\|_2^2 - \|\mathbf{x}_{t+1} - \mathbf{x}\|_2^2) + \frac{\eta_t}{2} \|\tilde{\nabla}f(\mathbf{x}_t, \xi_t) + \lambda_t \nabla g(\mathbf{x}_t)\|_2^2 + \zeta_t(\mathbf{x}) \\
 &\leq \frac{1}{2\eta_t} (\|\mathbf{x}_t - \mathbf{x}\|_2^2 - \|\mathbf{x}_{t+1} - \mathbf{x}\|_2^2) + \eta_t \|\tilde{\nabla}f(\mathbf{x}_t, \xi_t)\|_2^2 + \eta_t \lambda_t^2 \|\nabla g(\mathbf{x}_t)\|_2^2 + \zeta_t(\mathbf{x}) \\
 &\leq \frac{1}{2\eta_t} (\|\mathbf{x}_t - \mathbf{x}\|_2^2 - \|\mathbf{x}_{t+1} - \mathbf{x}\|_2^2) \\
 &\quad + 2\eta_t \underbrace{\|\tilde{\nabla}f(\mathbf{x}_t, \xi_t) - \nabla f(\mathbf{x}_t)\|_2^2}_{\equiv \Delta_t} + 2\eta_t \|\nabla f(\mathbf{x}_t)\|_2^2 + \eta_t \lambda_t^2 \|\nabla g(\mathbf{x}_t)\|_2^2 + \zeta_t(\mathbf{x})
 \end{aligned}$$

By using the bound on  $\|\nabla f(\mathbf{x}_t)\|_2$  and  $\|\nabla g(\mathbf{x}_t)\|_2$ , we obtain the first inequality in Lemma 1. To prove the second inequality in Lemma 1, we follow the same analysis, i.e.,

$$\begin{aligned}
 |\lambda_{t+1} - \lambda|^2 - |\lambda_t - \lambda|^2 &\leq |\lambda_t + \eta_t(g(\mathbf{x}_t) - \gamma\lambda_t)|^2 - |\lambda_t - \lambda|^2 \\
 &\leq \eta_t^2 |g(\mathbf{x}_t) - \gamma\lambda_t|^2 + 2\eta_t(\lambda_t - \lambda) \underbrace{(g(\mathbf{x}_t) - \gamma\lambda_t)}_{\equiv \nabla_{\lambda} L(\mathbf{x}_t, \lambda_t)}.
 \end{aligned}$$

Then we have

$$(\lambda - \lambda_t) \nabla_{\lambda} L(\mathbf{x}_t, \lambda_t) \leq \frac{1}{2\eta_t} (|\lambda_t - \lambda|^2 - |\lambda_{t+1} - \lambda|^2) + \frac{\eta_t}{2} |g(\mathbf{x}_t) - \gamma\lambda_t|^2.$$

By induction, it is straightforward to show that  $\lambda_t \leq C_2/\gamma$ , which yields the second inequality in Lemma 1, i.e.,

$$(\lambda - \lambda_t) \nabla_{\lambda} L(\mathbf{x}_t, \lambda_t) \leq \frac{1}{2\eta_t} (|\lambda_t - \lambda|^2 - |\lambda_{t+1} - \lambda|^2) + 2\eta_t C_2^2.$$

## B Proof of Lemma 2

Since  $L_t(\mathbf{x}, \lambda)$  is convex in  $\mathbf{x}$  and concave in  $\lambda$ , we have the following inequalities

$$\begin{aligned} L(\mathbf{x}, \lambda_t) - L(\mathbf{x}_t, \lambda_t) &\geq (\mathbf{x} - \mathbf{x}_t)^\top \nabla_{\mathbf{x}} L(\mathbf{x}_t, \lambda_t), \\ L(\mathbf{x}_t, \lambda) - L(\mathbf{x}_t, \lambda_t) &\leq (\lambda - \lambda_t) \nabla_{\lambda} L(\mathbf{x}_t, \lambda_t). \end{aligned}$$

Using the inequalities in Lemma 1, we have

$$\begin{aligned} L(\mathbf{x}_t, \lambda_t) - L(\mathbf{x}, \lambda_t) &\leq \frac{1}{2\eta_t} (\|\mathbf{x} - \mathbf{x}_t\|_2^2 - \|\mathbf{x} - \mathbf{x}_{t+1}\|_2^2) + 2\eta_t G_1^2 + \eta_t G_2^2 \lambda_t^2 + 2\eta_t \Delta_t + \zeta_t(\mathbf{x}), \\ L(\mathbf{x}_t, \lambda) - L(\mathbf{x}_t, \lambda_t) &\leq \frac{1}{2\eta_t} (|\lambda - \lambda_t|^2 - |\lambda - \lambda_{t+1}|^2) + 2\eta_t C_2^2, \end{aligned}$$

where  $\zeta_t(\mathbf{x}) = (\mathbf{x} - \mathbf{x}_t)^\top (\tilde{\nabla} f(\mathbf{x}_t, \xi_t) - \nabla f(\mathbf{x}_t))$  as abbreviated before. Since  $\eta_1 = \dots = \eta_T$ , denoted by  $\eta$ , by taking summation of above two inequalities over  $t = 1, \dots, T$ , we get

$$\sum_{t=1}^T L(\mathbf{x}_t, \lambda) - L(\mathbf{x}, \lambda_t) \leq \frac{\|\mathbf{x}\|_2^2}{2\eta} + \frac{\lambda^2}{2\eta} + 2\eta T(G_1^2 + C_2^2) + \sum_t \eta G_2^2 \lambda_t^2 + 2\eta \sum_{t=1}^T \Delta_t + \sum_{t=1}^T \zeta_t(\mathbf{x}).$$

By plugging the expression of  $L(\mathbf{x}, \lambda)$ , and due to  $\|\mathbf{x}\|_2 \leq 1$ , we have

$$\begin{aligned} &\sum_{t=1}^T (f(\mathbf{x}_t) - f(\mathbf{x})) + \lambda \sum_{t=1}^T g(\mathbf{x}_t) - \left( \frac{\gamma T}{2} + \frac{1}{2\eta} \right) \lambda^2 \\ &\leq \frac{1}{2\eta} + 2\eta T(G_1^2 + C_2^2) + \sum_t (\eta G_2^2 - \gamma/2) \lambda_t^2 + \sum_t \lambda_t g(\mathbf{x}) + 2\eta \sum_{t=1}^T \Delta_t + \sum_{t=1}^T \zeta_t(\mathbf{x}). \end{aligned}$$

Let  $\mathbf{x} = \mathbf{x}^* = \arg \min_{\mathbf{x} \in \mathcal{K}} f(\mathbf{x})$ . By taking minimization over  $\lambda \geq 0$  on left hand side and considering  $\eta = \gamma/(2G_2^2)$ , we have

$$\sum_{t=1}^T (f(\mathbf{x}_t) - f(\mathbf{x}^*)) + \frac{[\sum_{t=1}^T g(\mathbf{x}_t)]_+^2}{2(\gamma T + 2G_2^2/\gamma)} \leq \frac{G_2^2}{\gamma} + \frac{(G_1^2 + C_2^2)}{G_2^2} \gamma T + \frac{\gamma}{G_2^2} \sum_{t=1}^T \Delta_t + \sum_{t=1}^T \zeta_t(\mathbf{x}^*)$$

## C Proof of Lemma 3

Since  $F(\mathbf{x})$  is strongly convex in  $\mathbf{x}$ , we have

$$F(\mathbf{x}) - F(\mathbf{x}_t) \geq (\mathbf{x} - \mathbf{x}_t)^\top \nabla F(\mathbf{x}_t) + \frac{\beta}{2} \|\mathbf{x} - \mathbf{x}_t\|_2^2.$$

Following the same analysis as in Lemma 1, we have

$$\begin{aligned} (\mathbf{x}_t - \mathbf{x})^\top \nabla F(\mathbf{x}_t) &\leq \frac{1}{2\eta_t} (\|\mathbf{x} - \mathbf{x}_t\|_2^2 - \|\mathbf{x} - \mathbf{x}_{t+1}\|_2^2) + \frac{\eta_t}{2} \|\tilde{\nabla} f(\mathbf{x}_t, \xi_t) + p(\mathbf{x}_t) \lambda_0 \nabla g(\mathbf{x}_t)\|_2^2 \\ &\quad + \zeta_t(\mathbf{x}) - \frac{\beta}{2} \|\mathbf{x} - \mathbf{x}_t\|_2^2 \\ &\leq \frac{1}{2\eta_t} (\|\mathbf{x} - \mathbf{x}_t\|_2^2 - \|\mathbf{x} - \mathbf{x}_{t+1}\|_2^2) + \eta_t G_1^2 + \eta_t \lambda_0^2 G_2^2 + \zeta_t(\mathbf{x}) - \frac{\beta}{2} \|\mathbf{x} - \mathbf{x}_t\|_2^2, \end{aligned}$$

where

$$p(\mathbf{x}) = \frac{\exp(\lambda_0 g(\mathbf{x})/\gamma)}{1 + \exp(\lambda_0 g(\mathbf{x})/\gamma)}.$$

Taking summation of above inequality over  $t = 1, \dots, T$  gives

$$\begin{aligned} \sum_{t=1}^T F(\mathbf{x}_t) - F(\mathbf{x}) &\leq \sum_{t=1}^T \frac{1}{2} \left( \frac{1}{\eta_t} - \frac{1}{\eta_{t-1}} - \frac{\beta}{2} \right) \|\mathbf{x} - \mathbf{x}_t\|_2^2 \\ &\quad + \sum_{t=1}^T \eta_t (G_1^2 + \lambda_0^2 G_2^2) + \sum_{t=1}^T \zeta_t(\mathbf{x}) - \frac{\beta}{4} \sum_{t=1}^T \|\mathbf{x} - \mathbf{x}_t\|_2^2. \end{aligned}$$

Since  $\eta_t = 1/(2\beta t)$ , we have

$$\sum_{t=1}^T (F(\mathbf{x}_t) - F(\mathbf{x})) \leq \frac{(G_1^2 + \lambda_0^2 G_2^2)(1 + \ln T)}{2\beta} + \sum_{t=1}^T \zeta_t(\mathbf{x}) - \frac{\beta}{4} \sum_{t=1}^T \|\mathbf{x} - \mathbf{x}_t\|_2^2$$

We complete the proof by letting  $\mathbf{x} = \mathbf{x}^* = \arg \min_{\mathbf{x} \in \mathcal{K}} f(\mathbf{x})$ .

## D Proof of Lemma 4

The proof is based on the Bernstein inequality for martingales [1] which is restated here for completeness.

**Theorem 1.** (Bernsteins inequality for martingales). *Let  $X_1, \dots, X_n$  be a bounded martingale difference sequence with respect to the filtration  $\mathcal{F} = (\mathcal{F}_i)_{1 \leq i \leq n}$  and with  $\|X_i\| \leq K$ . Let*

$$S_i = \sum_{j=1}^i X_j$$

*be the associated martingale. Denote the sum of the conditional variances by*

$$\Sigma_n^2 = \sum_{t=1}^n \mathbb{E} [X_t^2 | \mathcal{F}_{t-1}],$$

*Then for all constants  $t, \nu > 0$ ,*

$$\Pr \left[ \max_{i=1, \dots, n} S_i > t \text{ and } \Sigma_n^2 \leq \nu \right] \leq \exp \left( -\frac{t^2}{2(\nu + Kt/3)} \right),$$

*and therefore,*

$$\Pr \left[ \max_{i=1, \dots, n} S_i > \sqrt{2\nu t} + \frac{\sqrt{2}}{3} Kt \text{ and } \Sigma_n^2 \leq \nu \right] \leq e^{-t}.$$

*Proof of Lemma 4.* Define martingale difference  $X_t = (\mathbf{x} - \mathbf{x}_t)^\top (\nabla f(\mathbf{x}_t) - \tilde{\nabla} f(\mathbf{x}_t, \xi_t))$  and martingale  $\Lambda_T = \sum_{t=1}^T X_t$ . Define the conditional variance  $\Sigma_T^2$  as

$$\Sigma_T^2 = \sum_{t=1}^T \mathbb{E}_{\xi_t} [X_t^2] \leq 4G_1^2 \sum_{t=1}^T \|\mathbf{x}_t - \mathbf{x}\|_2^2 = 4G_1^2 D_T.$$

Define  $K = 4G_1$ . We have

$$\begin{aligned} & \Pr \left( \Lambda_T \geq 2\sqrt{4G_1^2 D_T \tau} + \sqrt{2}K\tau/3 \right) \\ &= \Pr \left( \Lambda_T \geq 2\sqrt{4G_1^2 D_T \tau} + \sqrt{2}K\tau/3, \Sigma_T^2 \leq 4G_1^2 D_T \right) \\ &= \Pr \left( \Lambda_T \geq 2\sqrt{4G_1^2 D_T \tau} + \sqrt{2}K\tau/3, \Sigma_T^2 \leq 4G_1^2 D_T, D_T \leq \frac{4}{T} \right) \\ &+ \sum_{i=1}^m \Pr \left( \Lambda_T \geq 2\sqrt{4G_1^2 D_T \tau} + \sqrt{2}K\tau/3, \Sigma_T^2 \leq 4G_1^2 D_T, \frac{4}{T} 2^{i-1} < D_T \leq \frac{4}{T} 2^i \right) \\ &\leq \Pr \left( D_T \leq \frac{4}{T} \right) + \sum_{i=1}^m \Pr \left( \Lambda_T \geq \sqrt{2 \times 4G_1^2 \frac{4}{T} 2^i \tau} + \sqrt{2}K\tau/3, \Sigma_T^2 \leq 4G_1^2 \frac{4}{T} 2^i \right) \\ &\leq \Pr \left( D_T \leq \frac{4}{T} \right) + m e^{-\tau}. \end{aligned}$$

where we use the fact  $\|\mathbf{x}_t - \mathbf{x}\|_2^2 \leq 4$  for any  $\mathbf{x} \in \mathcal{B}$ , and the last step follows the Bernstein inequality for martingales. We complete the proof by setting  $\tau = \ln(m/\delta)$ .  $\square$

## References

- [1] S. Boucheron, G. Lugosi, and O. Bousquet. Concentration inequalities. In *Advanced Lectures on Machine Learning*, pages 208–240, 2003.
